# Supplementary material for: Cryptococcus neoformans Overcomes Stress of Azole Drugs by Formation of Disomy in Specific Multiple Chromosomes
Source: PLoS Pathog. 2010 Apr 1;6(4):e1000848. doi: 10.1371/journal.ppat.1000848 (PMC2848560; doi:10.1371/journal.ppat.1000848)
Supplement: Figure S2 — CGH plots of 14 chromosomes for strains H99R32, H99R64L, H99R128, H99Rvt16, and H99Rvt26. The genomic DNA of the experimental strain was hybridized against the genomic DNA of reference strain, H99. Each panel represents CGH plot of each chromosome. Chromosome number is indicated in the right side corner of each panel. X-axis represents the position of each gene arranged in the order of its chromosomal location. Y-axis plots gene copy number as a running average over seven genes calculated from log2 ratio of relative hybridization intensity. (1.45 MB XLS) [file ppat.1000848.s002.xls]

## Sheet: H99R64L
H99R64L

## Sheet: H99Rvt26
H99Rvt26

## Sheet: H99Rvt16 
H99Rvt16

## Sheet: H99R128
H99R128

## Sheet: H99R32
H99R32
